# Supplementary material
Source: Frontiers journal article supplement (https://www.frontiersin.org/articles/243176)
Supplement: Data_Sheet_2.PDF [file Data_Sheet_2.PDF]

## Appendix II

Table 1. A summary of the tabulated data about the reviewed papers.

| Authors                                                                                                  | Title                                                                                                    | Year | KW Role |          | Methods      |                          |                        |                 | Main Variables                                                                                                                                                                                                                                                                                                                                                                                                                                                                                                                                                                                                         | Question type |          |        | Journal                                                 | Population |       |     |                     |
|----------------------------------------------------------------------------------------------------------|----------------------------------------------------------------------------------------------------------|------|---------|----------|--------------|--------------------------|------------------------|-----------------|------------------------------------------------------------------------------------------------------------------------------------------------------------------------------------------------------------------------------------------------------------------------------------------------------------------------------------------------------------------------------------------------------------------------------------------------------------------------------------------------------------------------------------------------------------------------------------------------------------------------|---------------|----------|--------|---------------------------------------------------------|------------|-------|-----|---------------------|
|                                                                                                          |                                                                                                          |      | Direct  | Indirect | Neuroimaging | Questionnaire, Interview | Physiological Measures | Behavioral task |                                                                                                                                                                                                                                                                                                                                                                                                                                                                                                                                                                                                                        | External      | Internal | Impact |                                                         | N          | Women | Men | Mean Age            |
| Scott Parker, Jesse Bascom, Brian Rabinovitz, Debra Zellner                                              | Positive and negative hedonic contrast with musical stimuli                                              | 2008 | X       |          |              |                          |                        | X               | valence, arousal                                                                                                                                                                                                                                                                                                                                                                                                                                                                                                                                                                                                       |               | X        |        | Psychology of Aesthetics, Creativity and the Arts (APA) | 32         | X     | X   | Undergrad. Students |
| Liila Taruffi, Stefan Koelsch                                                                            | The paradox of music-evoked sadness: An online survey                                                    | 2014 |         | X        |              | X                        |                        |                 | 7 sections: (1) Core Details; (2) Musical Training and Musical Engagement; (3) Sad Music; (4) Principles Underlying the Evocation of Sadness by Music; (5) Rewarding Aspects of Music-Evoked Sadness; (6) Favourite Sad Music; and (7) Personality Questionnaires. Likert scales + open answers.                                                                                                                                                                                                                                                                                                                       | X             | X        |        | Public Library of Science (PLOS ONE)                    | 772        | 495   | 277 | 28,4                |
| Ernest Mas-Herrero, Robert Zatorre, Antoni Rodríguez-Fornells, Josep Marco-Pallarés                      | Dissociation between musical and monetary reward Responses in specific musical anhedonia.                | 2014 | X       |          |              |                          | X                      | X               | Physiological measures of emotional arousal; SCR and HR. Pleasure to music: 1-4, chill + overall pleasure: 1-10. Number & the intensity of chills :1-5 + familiarity rating. Monetary task: Magnitude (V2 or V0.2) and valence (gain or loss) of the potential outcome was indicated by a cue at the beginning of each trial. Pleasure experienced with different rewards (food, sex, music, money, exercise, and drugs) using a visual analog scale. In the follow up: we tested differences among groups in music emotion recognition absence or presence of four emotion domains (happy, sad, scary, and peaceful). |               | X        |        | Current Biology                                         | 30         | 17    | 13  | 23                  |
| Ernest Mas-Herrero, Josep Marco-Pallarés, Urbano Lorenzo-Seva, Robert Zatorre, Antoni Rodríguez-Fornells | Individual differences in music reward experiences                                                       | 2013 | X       |          |              | X                        |                        |                 | 112 items: music seeking activities, mood regulation, emotion evocation, sensory-motor behavior, social rewarding experiences, and musical memory, social desirability, BIS/BAS and other personality questionnaires. BIS/BAS and physical anhedonia scale.                                                                                                                                                                                                                                                                                                                                                            |               | X        |        | Music Perception                                        | 1661       | 1001  | 660 | 28                  |
| Benjamin Gold, Michael Frank, Brigitte Bogert, Elvira Brattico                                           | Pleasurable music affects reinforcement learning according to the listener.                              | 2013 | X       |          |              | X                        |                        | X               | Musical background, typical listening patterns (HIMAB). Home listening task: familiarity, pleasantness, and arousal: Likert scales. Reaction times, and wrong / right (accuracy).                                                                                                                                                                                                                                                                                                                                                                                                                                      |               |          | X      | Frontiers in Psychology                                 | 90         | 57    | 33  | 28                  |
| Sandra Garrido, Emery Schubert                                                                           | Individual differences in the enjoyment of negative emotion in music: A literature review and experiment | 2010 | X       |          |              | X                        |                        |                 | 93 items on a Likert scale: Background information, Music empathy, Fantasy Proness, Rumination, Dissociation, Exploratory variables, Empathic concern, Absorption                                                                                                                                                                                                                                                                                                                                                                                                                                                      |               | X        |        | Music Perception                                        | 59         | 26    | 33  | 22                  |
| Valorie Salimpoor, Mitchell Benovoy, Kevin Larcher, Alain Dahger, Robert Zatorre                         | Anatomically distinct dopamine release during anticipation and experience of peak emotion to music       | 2011 | X       |          | X            |                          | X                      |                 | Chills, dopamine release, emotional arousal: psychophysiological measurements, BOLD, Self-reports: number & intensity of chills, and degree of experienced pleasure.                                                                                                                                                                                                                                                                                                                                                                                                                                                   |               | X        |        | Nature Neuroscience                                     | 10         | 5     | 5   | 21                  |

| Authors                                                                                                        | Title                                                                                                              | Year | KW Role |          | Methods      |                          |                        |                 | Main Variables                                                                                                                                                              | Question type |          |        | Journal                                                                                | Population |       |     |          |
|----------------------------------------------------------------------------------------------------------------|--------------------------------------------------------------------------------------------------------------------|------|---------|----------|--------------|--------------------------|------------------------|-----------------|-----------------------------------------------------------------------------------------------------------------------------------------------------------------------------|---------------|----------|--------|----------------------------------------------------------------------------------------|------------|-------|-----|----------|
|                                                                                                                |                                                                                                                    |      | Direct  | Indirect | Neuroimaging | Questionnaire, Interview | Physiological Measures | Behavioral task |                                                                                                                                                                             | External      | Internal | Impact |                                                                                        | N          | Women | Men | Mean Age |
| Jonna Vuoskoski, William Thompson, Doris McIlwain, Tuomas Eerola                                               | Who enjoys listening to sad music and why?                                                                         | 2011 | X       |          |              | X                        |                        | X               | 3 sets of emotional rating scales representing different theories of emotion. Personality traits: Openness to Experience, empathy.                                          | X             | X        |        | Music Perception                                                                       | 148        | 114   | 34  | 24       |
| C. Montag, M. Reuter, N. Axmacher                                                                              | How one's favourite song activates the reward circuitry of the brain: Personality matters!                         | 2011 | X       |          | X            | X                        |                        |                 | music rated as likeable/unlikeable while choosing it. Personality assessment: Temperament and Character Inventory (TCI).                                                    | X             | X        |        | Behavioural Brain Research                                                             | 33         | 27    | 6   | 24       |
| Valorie Salimpoor, Iris van den Bosch, Natasa Kovacevic, Anthony Randal McIntosh, Alain Dagher, Robert Zatorre | Interactions between the nucleus accumbens and auditory cortices predict music reward value                        | 2013 | X       |          | X            |                          |                        | X               | Willingness to purchase music                                                                                                                                               |               | X        |        | Science                                                                                | 19         | 10    | 9   | X        |
| V. Menon, D.J. Levitin                                                                                         | The rewards of music listening: Response and physiological connectivity of the mesolimbic system                   | 2005 | X       |          | X            |                          |                        | X               | Rating from not at all pleasant to very pleasant.                                                                                                                           | X             |          |        | NeuroImage                                                                             | 13         | 7     | 6   | 19-24    |
| Leonid Perlovsky, Arnaud Cabanc, Marie-Claude Bonniot-Cabanc, Michel Cabanc                                    | Mozart effect, cognitive dissonance, and the pleasure of music                                                     | 2013 | X       |          |              |                          |                        | X               | Multiple choice training test + some other questions. Pleasantness of the music excerpts, answering time.                                                                   |               |          | X      | Behavioural Brain Research                                                             | 64         | X     | X   | 14-15    |
| Valorie Salimpoor, Mitchel Benovoy, Gregory Longo, Jeremy Cooperstock, Robert Zatorre                          | The rewarding aspects of music listening are related to degree of emotional arousal                                | 2009 | X       |          |              |                          | X                      | X               | Continuous recording of subjective pleasure and sympathetic nervous system activity, an objective measure of emotional arousal, chills.                                     |               | X        |        | Public Library of Science (PLOS ONE)                                                   | 32         | 17    | 15  | 22       |
| Marcel Zentner, Didier Grandjean, Klaus Scherer                                                                | Emotions evoked by the sound of music: Characterization, classification, and measurement                           | 2008 |         | X        |              | X                        |                        |                 | 515 emotional terms were rated according to if they were suitable to describe emotions in general, yes/no. Which of the previous terms would be actually relevant in music? | X             |          |        | Emotion - American Psychological Association                                           | 1393       | X     | X   | X        |
| Anne Blood, Robert Zatorre                                                                                     | Intensely pleasurable responses to music correlate with activity in brain regions implicated in reward and emotion | 2001 | X       |          | X            |                          | X                      | X               | Chills                                                                                                                                                                      | X             |          |        | Proceedings of the National Academy of Sciences of the United States of America (PNAS) | 10         | 5     | 5   | 20-30    |
| Iris van den Bosch, Valorie Salimpoor, Robert Zatorre                                                          | Familiarity mediates the relationship between emotional arousal and pleasure during music listening.               | 2013 | X       |          |              | X                        | X                      |                 | Physiological measure (EDA), self report on pleasure, familiarity and arousal, questionnaires on musical experience etc.                                                    |               | X        |        | Frontiers in Human Neuroscience                                                        | 60         | 32    | 28  | 25       |
| Steven Brown, Michael Martinez, Lawrence Parsons                                                               | Passive music listening spontaneously engages limbic and paralimbic systems                                        | 2004 | X       |          | X            |                          |                        | X               | Subjective ratings of liking and arousal/energy.                                                                                                                            | X             |          |        | NeuroReport                                                                            | 10         | 5     | 5   | 34       |

| Authors                                                                              | Title                                                                                                     | Year | KW Role |          | Methods      |                          |                        |                 | Main Variables                                                                                                                                                                                                                                                                                                                                                                                                                                                                                                    | Question type |          |        | Journal                                           | Population |       |     |          |
|--------------------------------------------------------------------------------------|-----------------------------------------------------------------------------------------------------------|------|---------|----------|--------------|--------------------------|------------------------|-----------------|-------------------------------------------------------------------------------------------------------------------------------------------------------------------------------------------------------------------------------------------------------------------------------------------------------------------------------------------------------------------------------------------------------------------------------------------------------------------------------------------------------------------|---------------|----------|--------|---------------------------------------------------|------------|-------|-----|----------|
|                                                                                      |                                                                                                           |      | Direct  | Indirect | Neuroimaging | Questionnaire, Interview | Physiological Measures | Behavioral task |                                                                                                                                                                                                                                                                                                                                                                                                                                                                                                                   | External      | Internal | Impact |                                                   | N          | Women | Men | Mean Age |
| Heather Chapin, Kelly Jantzen, Scott Kelso, Fred Steinberg, Edward Large             | Dynamic emotion and neural responses to music depend on performance expression and listener experience.   | 2010 |         | X        | X            |                          |                        | X               | Arousal+valence + behavioral task for real time reporting.                                                                                                                                                                                                                                                                                                                                                                                                                                                        | X             |          |        | Public Library of Science (PLOS ONE)              | 21         | 14    | 7   | 18       |
| Laurette Dubé, Sylvie Morin                                                          | Background music pleasure and store evaluation intensity effects and psychological mechanisms.            | 2001 | X       |          |              | X                        |                        |                 | Questionnaire: unpleasant to pleasant; bad to good. Attitudes towards: sales personnel, servicescape, store, perceived tempo of music.                                                                                                                                                                                                                                                                                                                                                                            |               |          | X      | Journal of Business Research                      | 110        | 85    | 25  | 23       |
| Audrey Laplante, Stephen Downie                                                      | The utilitarian and hedonic outcomes of music information-seeking in everyday life                        | 2011 | X       |          |              | X                        |                        |                 | Questions on: music taste and the place music occupies in their lives. To recall the last music artist or genre they had discovered and liked, and then to try to recall how it happened. Questions regarding the music information sources they used and how they interacted with them. More specifically to talk about the outcomes—hedonic and utilitarian—that contributed to making an interaction with a music IR system satisfying or not when seeking music for leisure purposes. Background information. |               |          | X      | Library & Information Science Research            | 15         | 5     | 10  | 24       |
| Marieke Hager, Dirk Hagemann Daniel Danner, Andrea Schankin                          | Assessing aesthetic Appreciation of visual Artworks - The construction of the art reception survey (ARS)  | 2012 |         | X        |              | X                        |                        | X               | For the questionnaire construction: Rating of the endorsement on a five-point rating scale. Assessment of art activity, art attitude, and art knowledge with a general questionnaire. Validation: Rating of IAPS pictures. The following dimension were also assessed: art activity, art attitude, and art knowledge.                                                                                                                                                                                             | X             | X        |        | Psychology of Aesthetics, Creativity and the Arts | 224        | 178   | 46  | 28       |
| M. Boccia, F. Nemmi, E. Tizzani, C. Guariglia, F. Ferlazzo, G. Galati, A.M. Giannini | Do you like Archimboldo's? Esthetic appreciation modulates brain activity in solving perceptual ambiguity | 2014 |         | X        | X            |                          |                        | X               | Aesthetic judgement (like / dislike) or classification task (artistic / non artistic)                                                                                                                                                                                                                                                                                                                                                                                                                             |               | X        |        | Behavioural Brain Research                        | 20         | 9     | 11  | 25       |
| Gerald Cupchik, Oshin Vartanian, Adrian Crawley, David Mikulis                       | Viewing artworks: Contributions of cognitive control and perceptual facilitation to aesthetic experience. | 2009 |         | X        | X            |                          |                        | X               | Object-identification and aesthetic viewing orientations (pragmatic and aesthetic viewing orientation). + 7-point Likert scale (evoking emotions) in the behavioral part + reaction time.                                                                                                                                                                                                                                                                                                                         | X             | X        |        | Brain and Cognition                               | 16         | 8     | 8   | X        |
| Richard Jacobs, Remco Renken, Frans Cornelissen                                      | Neural correlated visual aesthetics - Beauty as the coalescence of stimulus and internal state.           | 2012 |         | X        | X            |                          |                        | X               | Judgement of textures for their beauty, naturalness and roughness.                                                                                                                                                                                                                                                                                                                                                                                                                                                | X             | X        |        | Public Library of Science (PLOS ONE)              | 18         | 8     | 10  | 20-39    |

| Authors                                                                                                                                              | Title                                                                                                                                            | Year | KW Role |          | Methods      |                          |                        |                 | Main Variables                                                                                                                                                                                                                                                                                                                                                                                                                                           | Question type |          |        | Journal                                                   | Population |       |     |                     |
|------------------------------------------------------------------------------------------------------------------------------------------------------|--------------------------------------------------------------------------------------------------------------------------------------------------|------|---------|----------|--------------|--------------------------|------------------------|-----------------|----------------------------------------------------------------------------------------------------------------------------------------------------------------------------------------------------------------------------------------------------------------------------------------------------------------------------------------------------------------------------------------------------------------------------------------------------------|---------------|----------|--------|-----------------------------------------------------------|------------|-------|-----|---------------------|
|                                                                                                                                                      |                                                                                                                                                  |      | Direct  | Indirect | Neuroimaging | Questionnaire, Interview | Physiological Measures | Behavioral task |                                                                                                                                                                                                                                                                                                                                                                                                                                                          | External      | Internal | Impact |                                                           | N          | Women | Men | Mean Age            |
| Shigeo Takahashi                                                                                                                                     | Aesthetic properties of pictorial perception                                                                                                     | 1995 |         | X        |              |                          |                        | X               | Own expression / intuition? To match drawings with emotions.<br>To match non representational lines drawings with emotion labels on a 7 point scale.<br>The participants had to depict an emotion (no actual measure was used).                                                                                                                                                                                                                          |               | X        |        | Psychological Review (American Psychological Association) | 557        | X     | X   | X                   |
| Ute Kreplin, Stephen Fairclough                                                                                                                      | Activation of the rostromedial prefrontal cortex during the experience of positive emotion in the context of esthetic experience. An fNIRS study | 2013 |         | X        | X            | X                        |                        |                 | During picture viewing ratings for valence and complexity.<br>Pen&paper answers on own, introspective feelings.                                                                                                                                                                                                                                                                                                                                          | X             | X        |        | Frontiers in Human Neuroscience                           | 30         | 15    | 15  | 22                  |
| Benno Belke, Helmut Leder, Claus Chrstian Carbon, Tilo Strobach                                                                                      | Cognitive Fluency: High-level processing dynamics in art appreciation                                                                            | 2010 |         | X        |              |                          |                        | X               | Liking ratings of the paintings on a 4-point Likert scale.                                                                                                                                                                                                                                                                                                                                                                                               | X             | X        |        | Psychology of Aesthetics, Creativity and the Arts         | 20         | 17    | 3   | 26                  |
| Simon Lacey, Henrik Hagvedt, Vanessa Patrick, Amy Anderson, Randall Stilla, Gopikrishna Deshpande, Xiaoping Hu, Jao Sato, Srinivas Reddy, K. Sathian | Art for reward's sake: Visual art recruits the ventralstriatum                                                                                   | 2011 | X       |          | X            |                          |                        | X               | Behavioral variables: response time, familiarity ratings and ratings of esthetic preference                                                                                                                                                                                                                                                                                                                                                              | X             |          |        | NeuroImage                                                | 8          | 4     | 4   | 23                  |
| Slobodan Markovic                                                                                                                                    | Aesthetic experience and the emotional content of paintings                                                                                      | 2010 |         | X        |              |                          |                        | X               | The developed instrument: unipolar seven-point scales ratings on the chosen descriptors.                                                                                                                                                                                                                                                                                                                                                                 |               | X        |        | Psihologija (Serbian Psychological Association)           | 31         | 18    | 13  | Undergrad. Students |
| Assaf Kron, Ariel Goldstein, Maryna Pilkiw, Daniel Lee, Katherine Gardhouse, Adam Anderson                                                           | Spending one's time: The hedonic principle in ad libitum viewing of pictures                                                                     | 2014 | X       |          |              |                          | X                      | X               | Affect rating scales (arousal and bipolar valence), complexity scale. Bipolar valence and arousal, EDA and facial EMG activity.                                                                                                                                                                                                                                                                                                                          | X             | X        |        | Emotion (American Psychological Association)              | 194        | 118   | 76  | X                   |
| Edward Vessel, Gabrielle Starr, Nava Rubin                                                                                                           | The brain on art: Intense aesthetic experience activates the default mode network                                                                | 2012 |         | X        | X            | X                        |                        |                 | Nine-item question-naire: evaluative and emotional components of their aesthetic experience. A scale of 1–4 to answer the question “how strongly does this painting move you?” + As a PC questionnaire: Observers were asked to rate the intensity with which each artwork evoked the following evaluative/emotional responses:joy, pleasure, sadness, confusion, awe, fear, disgust, beauty, and the sublime with a 7-point scale. Prior to fMRI PANAS. |               | X        |        | Frontiers in Human Neuroscience                           | 16         | 5     | 11  | 28                  |
